# Supplementary material
Source: publisher site journal article supplement (https://www.dovepress.com/article/354013)
Supplement: Supplementary file 1 [file get_supplementary_file.php]

**Supplementary Table.1** Patient Demographics and Disease Characteristics at QUEST Study Baseline

|  | **< 100 mL FEV1 at Week 12** | | **≥ 100 mL FEV1 at Week 12** | | **< 200 mL FEV1 at Week 12** | | **≥ 200 mL FEV1 at Week 12** | |
| --- | --- | --- | --- | --- | --- | --- | --- | --- |
| **Without improvement** | | **With improvement** | | **Without improvement** | | **With improvement** | |
| **Combined placebo**  **(n = 236)** | **Combined dupilumab**  **(n = 310)** | **Combined placebo**  **(n = 274)** | **Combined dupilumab**  **(n = 649)** | **Combined placebo**  **(n = 300)** | **Combined dupilumab**  **(n = 422)** | **Combined placebo**  **(n = 210)** | **Combined dupilumab**  **(n = 537)** |
| Age, mean (SD), years | 49.8 (14.4) | 50.9 (14.6) | 46.4 (15.4) | 45.8 (15.4) | 49.9 (14.5) | 50.4 (15.0) | 45.1 (15.2) | 45.1 (15.2) |
| Male sex,  n (%) | 77 (32.6) | 125 (40.3) | 111 (40.5) | 258 (39.8) | 97 (32.3) | 165 (39.1) | 91 (43.3) | 218 (40.6) |
| BMI, mean (SD), kg/m2 | 30.14 (7.49) | 29.84 (6.72) | 28.78 (6.73) | 28.44 (6.30) | 30.01 (7.43) | 29.94 (6.71) | 28.55 (6.55) | 28.07 (6.15) |
| Age at asthma onset, mean (SD), years | 28.3 (18.6) | 27.5 (20.3) | 26.8 (18.9) | 26.6 (18.7) | 28.5 (18.9) | 27.2 (19.9) | 26.1 (18.5) | 26.7 (18.7) |
| Number of exacerbations in past year,  mean (SD) | 2.21 (1.92) | 1.89 (3.07) | 2.21 (1.87) | 2.16 (2.01) | 2.20 (1.97) | 1.91 (2.75) | 2.23 (1.78) | 2.19 (2.10) |
| Pre-bronchodilator FEV1, mean (SD), L | 1.78 (0.60) | 1.87 (0.63) | 1.75 (0.60) | 1.76 (0.61) | 1.76 (0.59) | 1.84 (0.61) | 1.77 (0.61) | 1.76 (0.62) |
| ACQ-5 score, mean (SD) | 2.74 (0.73) | 2.76 (0.80) | 2.77 (0.76) | 2.77 (0.79) | 2.73 (0.74) | 2.78 (0.79) | 2.80 (0.76) | 2.76 (0.80) |
| Blood eosinophils, median (Q1–Q3), cells/µL | 350.00  (210.00–530.00) | 250.00  (180.00–410.00) | 340.00  (190.00–620.00) | 360.00  (210.00–600.00) | 320.00  (210.00–520.00) | 260.00  (180.00–440.00) | 360.00  (200.00–680.00) | 370.00  (220.00–620.00) |
| FeNO, median (Q1–Q3), ppb | 29.00  (18.00–53.00) | 24.00  (14.00–37.50) | 34.00  (21.00–52.00) | 32.00  (21.00–57.00) | 29.00  (18.00–50.00) | 25.00  (14.00–38.00) | 34.50  (21.00–55.00) | 36.00  (22.00–59.00) |

ACQ-5, 5-item asthma control questionnaire; BMI, body mass index; FeNO, fractional exhaled nitric oxide; FEV1, forced expiratory volume in 1 second; ppb, parts per billion; SD, standard deviation.
